# Supplementary material for: Transcriptional dysregulation of TRIM29 promotes colorectal cancer carcinogenesis via pyruvate kinase-mediated glucose metabolism
Source: Aging (Albany NY). 2021 Jan 20;13(4):5034–54. doi: 10.18632/aging.202414 (PMC7950264; doi:10.18632/aging.202414)
Supplement: Supplementary Figures [file aging-13-202414-s001.pdf]

## SUPPLEMENTARY FIGURES

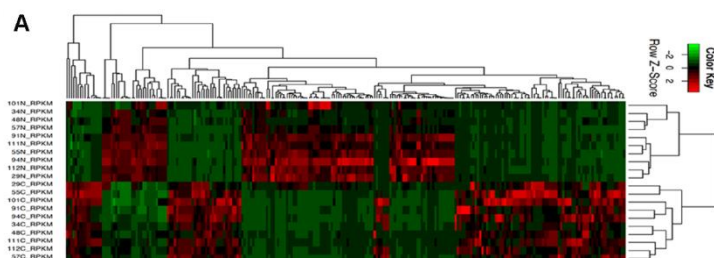

**Supplementary Figure 1. (A)** Heat map of the mRNA profile showing DEGs in CRC.

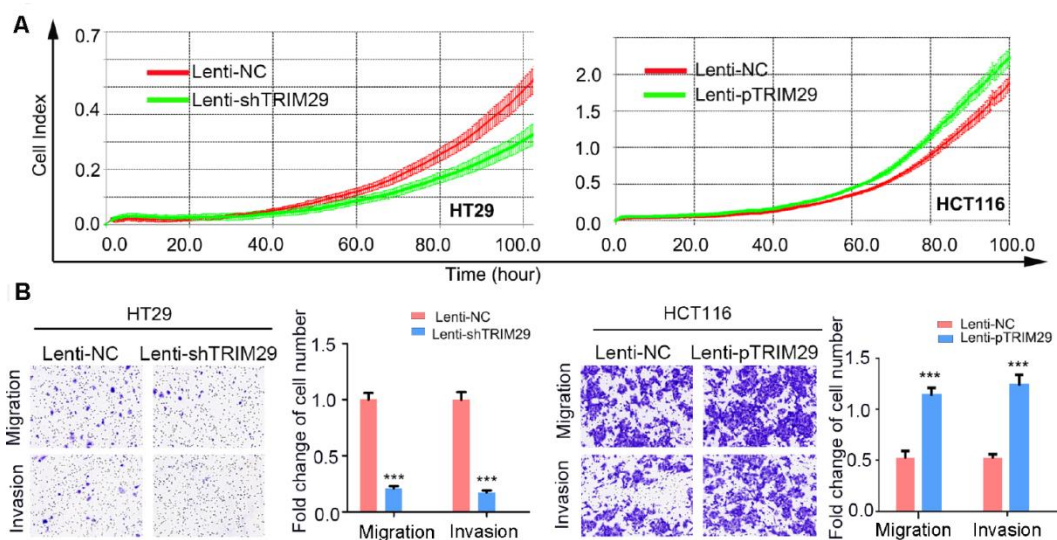

**Supplementary Figure 2. HT29 cells were stably infected with lenti-NC or lenti-shTRIM29 and HCT116 cells were stably infected with lenti-NC or lenti-pTRIM29. (A)** RTCA-MP was performed. **(B)** Transwell assays were performed. The statistical analysis was performed using the two-tailed Student's t-test. \*\* $P < 0.01$ , \*\*\* $P < 0.001$ .

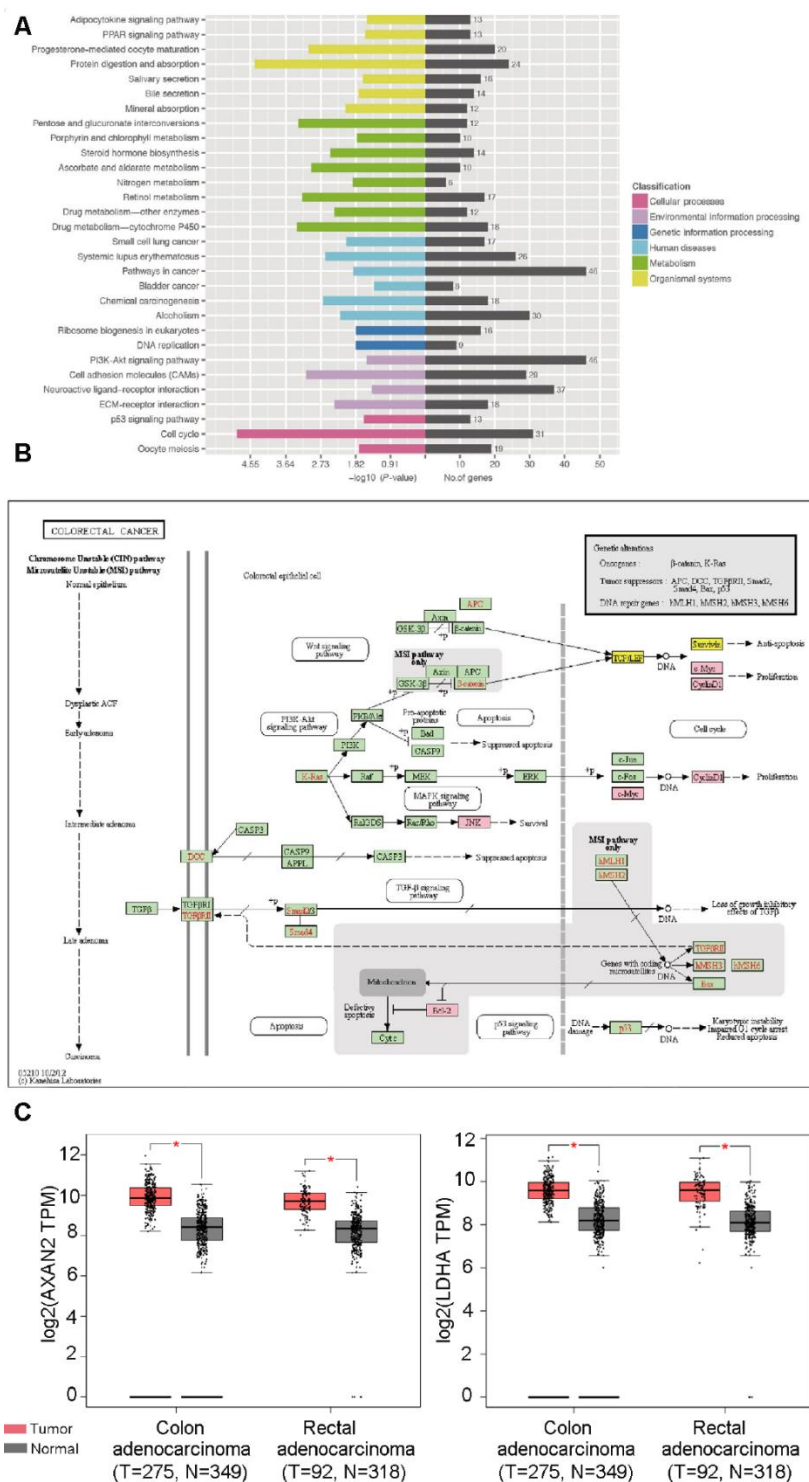

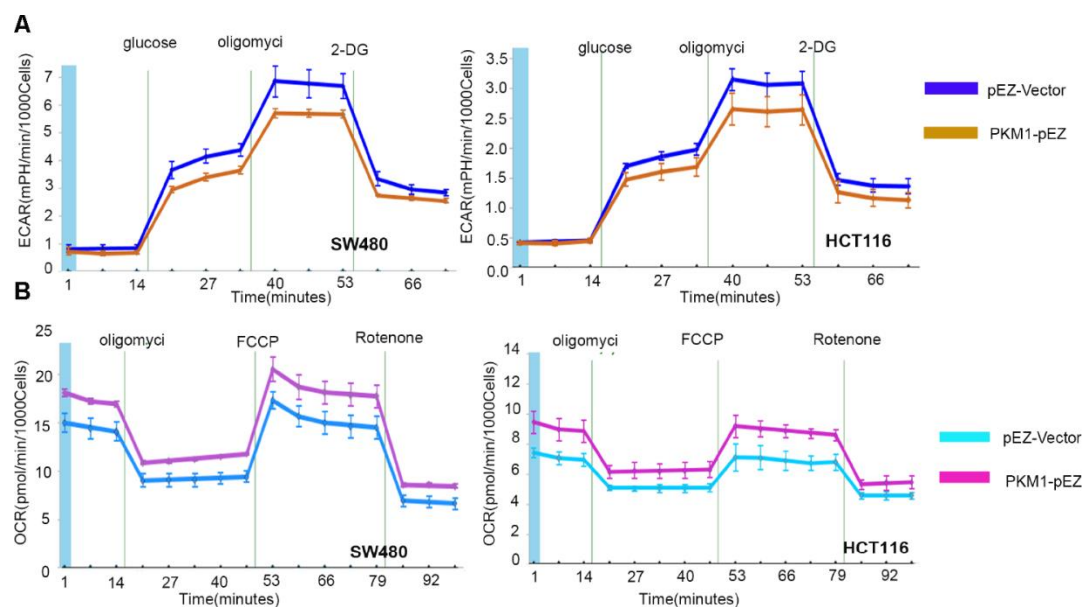

**Supplementary Figure 4.** (A) The ECAR and (B) OCR of cells transfected with NC or Si2 was measured. The statistical analysis was performed using the two-tailed Student's t-test. \*\* $P < 0.01$ , \*\*\* $P < 0.001$ .
